# Supplementary material
Source: PubMed Central journal article supplement (PMC2775802)
Supplement: NIHMS153597-supplement-02.pdf [file NIHMS153597-supplement-02.pdf]

Table S1

| Symbol        | GeneID    | Name                                                                | Probe        | Fold Change (FoxO3 <sup>-/-</sup> over FoxO3 <sup>+/+</sup> ) | q-value | MENSE_HYPOXIA_UP | HYPOXIA_REVIEW | HYPOXIA_FIBRO_UP | HYPOXIA_REG_UP | HIF1_TARGETS | SERUM_FIBROBLAST_CORE_DN | V\$_HIF1_Q3 | AGEING_BRAIN_UP | AGED_MOUSE_HIPPOCAMPUS_ANY_UP | V\$_FOXO4_01 | SERUM_FIBROBLAST_CORE_DN | CHANG_SERUM_RESPONSE_DN | HSA00051_FRUCTOSE_AND_MANNOSE_METABOLISM | GLYCOLYSIS |
|---------------|-----------|---------------------------------------------------------------------|--------------|---------------------------------------------------------------|---------|------------------|----------------|------------------|----------------|--------------|--------------------------|-------------|-----------------|-------------------------------|--------------|--------------------------|-------------------------|------------------------------------------|------------|
| Xlr3a         | 22445     | X-linked lymphocyte-regulated 3A                                    | 1420357_s_at | 0.341                                                         | 0.000   | 0                | 0              | 0                | 0              | 0            | 0                        | 0           | 0               | 0                             | 0            | 0                        | 0                       | 0                                        | 0          |
| FoxO3         | 56484     | forkhead box O3a                                                    | 1434831_a_at | 0.445                                                         | 0.000   | 0                | 0              | 0                | 0              | 0            | 0                        | 0           | 0               | 0                             | 0            | 0                        | 0                       | 0                                        | 0          |
| FoxO3         | 56484     | forkhead box O3a                                                    | 1434832_at   | 0.478                                                         | 0.000   | 0                | 0              | 0                | 0              | 0            | 0                        | 0           | 0               | 0                             | 0            | 0                        | 0                       | 0                                        | 0          |
| Slc2a3        | 20527     | solute carrier family 2 (facilitated glucose transporter), member 3 | 1455898_x_at | 0.487                                                         | 0.000   | 1                | 1              | 0                | 0              | 1            | 0                        | 0           | 0               | 0                             | 0            | 0                        | 0                       | 0                                        | 0          |
| Slc2a3        | 20527     | solute carrier family 2 (facilitated glucose transporter), member 3 | 1437052_s_at | 0.488                                                         | 0.000   | 1                | 1              | 0                | 0              | 1            | 0                        | 0           | 0               | 0                             | 0            | 0                        | 0                       | 0                                        | 0          |
| Prss35        | 244954    | protease, serine, 35                                                | 1434195_at   | 0.499                                                         | 0.000   | 0                | 0              | 0                | 0              | 0            | 0                        | 0           | 0               | 0                             | 0            | 0                        | 0                       | 0                                        | 0          |
| Vit           | 74199     | vitrin                                                              | 1426231_at   | 0.504                                                         | 0.001   | 0                | 0              | 0                | 0              | 0            | 0                        | 0           | 0               | 0                             | 1            | 0                        | 0                       | 0                                        | 0          |
| Cdh13         | 12554     | cadherin 13                                                         | 1454015_a_at | 0.512                                                         | 0.000   | 0                | 0              | 0                | 0              | 0            | 0                        | 0           | 0               | 0                             | 0            | 0                        | 0                       | 0                                        | 0          |
| Sbsn          | 282619    | suprabasin                                                          | 1459897_a_at | 0.517                                                         | 0.001   | 0                | 0              | 0                | 0              | 0            | 0                        | 0           | 0               | 0                             | 0            | 0                        | 0                       | 0                                        | 0          |
| Six3          | 20473     | sine oculis-related homeobox 3 homolog (Drosophila)                 | 1427523_at   | 0.519                                                         | 0.000   | 0                | 0              | 0                | 0              | 0            | 0                        | 0           | 0               | 0                             | 0            | 0                        | 0                       | 0                                        | 0          |
| Otx2          | 18424     | orthodenticle homolog 2 (Drosophila)                                | 1425926_a_at | 0.525                                                         | 0.001   | 0                | 0              | 0                | 0              | 0            | 0                        | 0           | 0               | 0                             | 1            | 0                        | 0                       | 0                                        | 0          |
| Gad1          | 14415     | glutamic acid decarboxylase 1                                       | 1416561_at   | 0.531                                                         | 0.000   | 0                | 0              | 0                | 0              | 0            | 0                        | 0           | 0               | 0                             | 0            | 0                        | 0                       | 0                                        | 0          |
| Ddit4         | 74747     | DNA-damage-inducible transcript 4                                   | 1428306_at   | 0.536                                                         | 0.000   | 0                | 0              | 0                | 1              | 0            | 1                        | 1           | 1               | 1                             | 0            | 0                        | 0                       | 0                                        | 0          |
| Ndrp1         | 17988     | N-myc downstream regulated gene 1                                   | 1423413_at   | 0.539                                                         | 0.002   | 1                | 0              | 0                | 0              | 0            | 0                        | 1           | 0               | 1                             | 0            | 0                        | 0                       | 0                                        | 0          |
| Selenbp1      | 20341     | selenium binding protein 1                                          | 1450699_at   | 0.544                                                         | 0.002   | 0                | 0              | 0                | 0              | 0            | 0                        | 0           | 0               | 1                             | 0            | 1                        | 0                       | 0                                        | 0          |
| Afap12        | 226250    | actin filament associated protein 1-like 2                          | 1436870_s_at | 0.546                                                         | 0.002   | 0                | 0              | 0                | 0              | 0            | 0                        | 0           | 0               | 0                             | 0            | 0                        | 0                       | 0                                        | 0          |
| Ndrp1         | 17988     | N-myc downstream regulated gene 1                                   | 1456174_x_at | 0.547                                                         | 0.002   | 1                | 0              | 0                | 0              | 0            | 0                        | 1           | 0               | 1                             | 0            | 0                        | 0                       | 0                                        | 0          |
| LOC100047339  | 100047339 | similar to lysyl oxidase-like 2                                     | 1431004_at   | 0.549                                                         | 0.002   | 0                | 0              | 0                | 0              | 0            | 0                        | 0           | 0               | 0                             | 0            | 0                        | 0                       | 0                                        | 0          |
| Preli2        | 77619     | PRELI domain containing 2                                           | 1436194_at   | 0.549                                                         | 0.003   | 0                | 0              | 0                | 0              | 0            | 0                        | 0           | 0               | 0                             | 0            | 0                        | 0                       | 0                                        | 0          |
| Ero1l         | 50527     | ERO1-like (S. cerevisiae)                                           | 1419030_at   | 0.552                                                         | 0.002   | 1                | 0              | 0                | 0              | 0            | 0                        | 1           | 0               | 0                             | 0            | 0                        | 0                       | 0                                        | 0          |
| Eno2          | 13807     | enolase 2, gamma neuronal                                           | 1418829_a_at | 0.552                                                         | 0.002   | 1                | 0              | 1                | 0              | 0            | 0                        | 0           | 0               | 0                             | 0            | 0                        | 0                       | 0                                        | 1          |
| Npnt          | 114249    | nephronectin                                                        | 1452106_at   | 0.556                                                         | 0.002   | 0                | 0              | 0                | 0              | 0            | 0                        | 0           | 0               | 0                             | 0            | 0                        | 0                       | 0                                        | 0          |
| Selenbp2      | 20342     | selenium binding protein 2                                          | 1417580_s_at | 0.557                                                         | 0.002   | 0                | 0              | 0                | 0              | 0            | 0                        | 0           | 0               | 0                             | 0            | 0                        | 0                       | 0                                        | 0          |
| AI851790      | 268354    | expressed sequence AI851790                                         | 1438007_at   | 0.558                                                         | 0.002   | 0                | 0              | 0                | 0              | 0            | 0                        | 0           | 0               | 0                             | 0            | 0                        | 0                       | 0                                        | 0          |
| 2900019G14Rik | 72932     | RIKEN cDNA 2900019G14 gene                                          | 1438194_at   | 0.559                                                         | 0.002   | 0                | 0              | 0                | 0              | 0            | 0                        | 0           | 0               | 0                             | 0            | 0                        | 0                       | 0                                        | 0          |
| Ero1l         | 50527     | ERO1-like (S. cerevisiae)                                           | 1449324_at   | 0.560                                                         | 0.002   | 1                | 0              | 0                | 0              | 0            | 0                        | 1           | 0               | 0                             | 0            | 0                        | 0                       | 0                                        | 0          |
| Vegfa         | 22339     | vascular endothelial growth factor A                                | 1420909_at   | 0.561                                                         | 0.002   | 0                | 0              | 0                | 0              | 0            | 0                        | 0           | 0               | 0                             | 0            | 0                        | 0                       | 0                                        | 0          |
| Ppp1r3c       | 53412     | protein phosphatase 1, regulatory (inhibitor) subunit 3C            | 1425631_at   | 0.566                                                         | 0.002   | 1                | 0              | 0                | 1              | 0            | 0                        | 1           | 0               | 0                             | 0            | 0                        | 0                       | 0                                        | 0          |
| Gdpp3         | 68616     | glycerophosphodiester phosphodiesterase domain containing 3         | 1449526_a_at | 0.567                                                         | 0.001   | 0                | 0              | 0                | 0              | 0            | 0                        | 0           | 0               | 0                             | 0            | 0                        | 0                       | 0                                        | 0          |
| Lhfp13        | 269629    | lipoma HMGIC fusion partner-like 3                                  | 1433990_at   | 0.570                                                         | 0.002   | 0                | 0              | 0                | 0              | 0            | 0                        | 0           | 0               | 0                             | 0            | 0                        | 0                       | 0                                        | 0          |
| Ero1l         | 50527     | ERO1-like (S. cerevisiae)                                           | 1419029_at   | 0.574                                                         | 0.003   | 1                | 0              | 0                | 0              | 0            | 0                        | 1           | 0               | 0                             | 0            | 0                        | 0                       | 0                                        | 0          |
| Fosl2         | 14284     | fos-like antigen 2                                                  | 1437247_at   | 0.576                                                         | 0.002   | 0                | 0              | 0                | 0              | 0            | 0                        | 0           | 0               | 0                             | 1            | 0                        | 0                       | 0                                        | 0          |
| Mmd2          | 75104     | monocyte to macrophage differentiation-associated 2                 | 1438654_x_at | 0.581                                                         | 0.003   | 0                | 0              | 0                | 0              | 0            | 0                        | 0           | 0               | 0                             | 0            | 0                        | 0                       | 0                                        | 0          |
| Nrn1          | 68404     | neuritin 1                                                          | 1428393_at   | 0.583                                                         | 0.002   | 0                | 0              | 0                | 0              | 0            | 0                        | 0           | 0               | 0                             | 0            | 0                        | 0                       | 0                                        | 0          |
| Sbsn          | 282619    | suprabasin                                                          | 1439630_x_at | 0.587                                                         | 0.004   | 0                | 0              | 0                | 0              | 0            | 0                        | 0           | 0               | 0                             | 0            | 0                        | 0                       | 0                                        | 0          |
| Pdk1          | 228026    | pyruvate dehydrogenase kinase, isoenzyme 1                          | 1423747_a_at | 0.588                                                         | 0.003   | 1                | 0              | 0                | 0              | 0            | 0                        | 0           | 0               | 0                             | 0            | 0                        | 0                       | 0                                        | 0          |
| Pdk4          | 27273     | pyruvate dehydrogenase kinase, isoenzyme 4                          | 1417273_at   | 0.592                                                         | 0.004   | 0                | 0              | 0                | 0              | 0            | 0                        | 0           | 0               | 0                             | 1            | 0                        | 0                       | 0                                        | 0          |
| NA            | NA        | NA                                                                  | 1452107_s_at | 0.592                                                         | 0.006   | 0                | 0              | 0                | 0              | 0            | 0                        | 0           | 0               | 0                             | 0            | 0                        | 0                       | 0                                        | 0          |
| Ddx3y         | 26900     | DEAD (Asp-Glu-Ala-Asp) box polypeptide 3, Y-linked                  | 1426438_at   | 0.593                                                         | 0.002   | 0                | 0              | 0                | 0              | 0            | 0                        | 0           | 0               | 0                             | 0            | 0                        | 0                       | 0                                        | 0          |
| 3110057O12Rik | 269423    | RIKEN cDNA 3110057O12 gene                                          | 1455475_at   | 0.594                                                         | 0.003   | 0                | 0              | 0                | 0              | 0            | 0                        | 0           | 0               | 0                             | 0            | 0                        | 0                       | 0                                        | 0          |
| Ankrd37       | 654824    | ankyrin repeat domain 37                                            | 1436538_at   | 0.595                                                         | 0.003   | 1                | 0              | 0                | 0              | 0            | 0                        | 0           | 0               | 0                             | 0            | 0                        | 0                       | 0                                        | 0          |
| Ndrp2         | 29811     | N-myc downstream regulated gene 2                                   | 1448154_at   | 0.596                                                         | 0.003   | 0                | 0              | 0                | 0              | 0            | 0                        | 0           | 0               | 0                             | 0            | 0                        | 0                       | 0                                        | 0          |
| Fgf11         | 14166     | fibroblast growth factor 11                                         | 1439959_at   | 0.598                                                         | 0.005   | 0                | 0              | 0                | 0              | 0            | 0                        | 1           | 0               | 0                             | 0            | 0                        | 0                       | 0                                        | 0          |
| Lgi1          | 56839     | leucine-rich repeat LGI family, member 1                            | 1423183_at   | 0.599                                                         | 0.011   | 0                | 0              | 0                | 0              | 0            | 0                        | 0           | 0               | 0                             | 0            | 0                        | 0                       | 0                                        | 0          |
| Vegfa         | 22339     | vascular endothelial growth factor A                                | 1451959_a_at | 0.600                                                         | 0.005   | 0                | 0              | 0                | 0              | 0            | 0                        | 0           | 0               | 0                             | 0            | 0                        | 0                       | 0                                        | 0          |
| Mmd2          | 75104     | monocyte to macrophage differentiation-associated 2                 | 1424534_at   | 0.601                                                         | 0.005   | 0                | 0              | 0                | 0              | 0            | 0                        | 0           | 0               | 0                             | 0            | 0                        | 0                       | 0                                        | 0          |
| Clu           | 12759     | clusterin                                                           | 1437689_x_at | 0.601                                                         | 0.008   | 0                | 0              | 0                | 0              | 0            | 0                        | 0           | 0               | 0                             | 0            | 0                        | 0                       | 0                                        | 0          |
| Six3os1       | 100043902 | Six3 opposite strand transcript 1                                   | 1431168_at   | 0.603                                                         | 0.003   | 0                | 0              | 0                | 0              | 0            | 0                        | 0           | 0               | 0                             | 0            | 0                        | 0                       | 0                                        | 0          |
| Ppp1r3c       | 53412     | protein phosphatase 1, regulatory (inhibitor) subunit 3C            | 1433691_at   | 0.604                                                         | 0.002   | 1                | 0              | 0                | 1              | 0            | 0                        | 1           | 0               | 0                             | 0            | 0                        | 0                       | 0                                        | 0          |
| Gng2          | 14702     | guanine nucleotide binding protein (G protein), gamma 2             | 1418452_at   | 0.604                                                         | 0.003   | 0                | 0              | 0                | 0              | 0            | 0                        | 0           | 0               | 0                             | 0            | 0                        | 0                       | 0                                        | 0          |
| Ndrp1         | 17988     | N-myc downstream regulated gene 1                                   | 1420760_s_at | 0.605                                                         | 0.009   | 1                | 0              | 0                | 0              | 0            | 0                        | 1           | 0               | 1                             | 0            | 0                        | 0                       | 0                                        | 0          |
| Cdh13         | 12554     | cadherin 13                                                         | 1434115_at   | 0.606                                                         | 0.006   | 0                | 0              | 0                | 0              | 0            | 0                        | 0           | 0               | 0                             | 0            | 0                        | 0                       | 0                                        | 0          |
| Pcdh15        | 11994     | protocadherin 15                                                    | 1444317_at   | 0.609                                                         | 0.006   | 0                | 0              | 0                | 0              | 0            | 0                        | 0           | 0               | 0                             | 0            | 0                        | 0                       | 0                                        | 0          |
| Slc2a3        | 20527     | solute carrier family 2 (facilitated glucose transporter), member 3 | 1421924_at   | 0.609                                                         | 0.006   | 1                | 1              | 0                | 0              | 1            | 0                        | 0           | 0               | 0                             | 0            | 0                        | 0                       | 0                                        | 0          |
| Flt1          | 14254     | FMS-like tyrosine kinase 1                                          | 1419300_at   | 0.613                                                         | 0.007   | 0                | 1              | 0                | 0              | 1            | 0                        | 0           | 0               | 0                             | 1            | 0                        | 0                       | 0                                        | 0          |
| Dbp           | 13170     | D site albumin promoter binding protein                             | 1438211_s_at | 0.613                                                         | 0.006   | 0                | 0              | 0                | 0              | 0            | 0                        | 0           | 0               | 1                             | 1            | 0                        | 0                       | 0                                        | 0          |
| Fgf1          | 14164     | fibroblast growth factor 1                                          | 1423136_at   | 0.613                                                         | 0.004   | 0                | 0              | 0                | 0              | 0            | 0                        | 0           | 0               | 0                             | 0            | 0                        | 0                       | 0                                        | 0          |
| Angpt2        | 11601     | angiopoietin 2                                                      | 1448831_at   | 0.614                                                         | 0.009   | 0                | 1              | 0                | 0              | 0            | 0                        | 0           | 0               | 0                             | 1            | 0                        | 0                       | 0                                        | 0          |
| Pdlim3        | 53318     | PDZ and LIM domain 3                                                | 1449178_at   | 0.614                                                         | 0.004   | 0                | 0              | 0                | 0              | 0            | 0                        | 1           | 0               | 1                             | 0            | 0                        | 0                       | 0                                        | 0          |
| Nr2f2         | 11819     | nuclear receptor subfamily 2, group F, member 2                     | 1416158_at   | 0.614                                                         | 0.011   | 0                | 0              | 0                | 0              | 0            | 0                        | 1           | 0               | 0                             | 1            | 0                        | 0                       | 0                                        | 0          |
| Gng2          | 14702     | guanine nucleotide binding protein (G protein), gamma 2             | 1428156_at   | 0.620                                                         | 0.008   | 0                | 0              | 0                | 0              | 0            | 0                        | 0           | 0               | 0                             | 0            | 0                        | 0                       | 0                                        | 0          |
| Gpi1          | 14751     | glucose phosphate isomerase 1                                       | 1456909_at   | 0.620                                                         | 0.003   | 0                | 0              | 0                | 0              | 0            | 0                        | 0           | 0               | 0                             | 0            | 0                        | 0                       | 0                                        | 0          |
| Pdlim4        | 30794     | PDZ and LIM domain 4                                                | 1417928_at   | 0.620                                                         | 0.006   | 0                | 0              | 1                | 0              | 0            | 0                        | 0           | 0               | 0                             | 1            | 0                        | 0                       | 0                                        | 0          |
